# Supplementary material for: How many more polymorphs of ROY remain undiscovered
Source: PubMed Central journal article supplement (PMC8809489; doi:10.1039/d1sc06074k), 2021-12-13
Supplement: SC-013-D1SC06074K-s002.pdf [file SC-013-D1SC06074K-s002.pdf]

# Supporting Information for “How many more polymorphs of ROY remain undiscovered?”

Gregory J. O. Beran,<sup>\*,†</sup> Isaac J. Sugden,<sup>‡</sup> Chandler Greenwell,<sup>†</sup> David H. Bowskill,<sup>‡</sup> Constantinos C. Pantelides,<sup>‡</sup> and Claire S. Adjiman<sup>‡</sup>

<sup>†</sup>*Department of Chemistry, University of California Riverside, Riverside CA 92521, USA*

<sup>‡</sup>*Department of Chemical Engineering, Centre for Process Systems Engineering, Imperial College London, London, SW7 2AZ, United Kingdom*

E-mail: gregory.beran@ucr.edu

Phone: +1 (951) 827-7869

## Contents

|                                                                      |           |
|----------------------------------------------------------------------|-----------|
| <b>S1 Crystal structure prediction methods</b>                       | <b>2</b>  |
| <b>S2 Additional Data</b>                                            | <b>6</b>  |
| S2.1 Comparison of DFT and experimental crystal structures . . . . . | 6         |
| S2.2 ROY conformational energy profile . . . . .                     | 7         |
| S2.3 Relative energies of the ROY polymorphs . . . . .               | 8         |
| S2.4 Analysis of CSP structures with $Z' = 2$ . . . . .              | 14        |
| S2.5 High-pressure calculations . . . . .                            | 16        |
| <b>References</b>                                                    | <b>17</b> |

# S1 Crystal structure prediction methods

Generation of putative crystal structures was undertaken through six stages: (i) isolated molecule studies; (ii) global search; (iii) refinement with a transferable repulsion/dispersion (r/d) potential; (iv) refinement with a tailored r/d potential; (v) structure geometry refinement with B86bPBE-XDM, and (vi) final single-point energies with B86bPBE-XDM +  $\Delta$ SCS-MP2D. The first three stages follow the general strategy presented in Pantelides et al.<sup>1</sup> and were employed in previous work on ROY.<sup>2</sup> However, the structure prediction process here was performed from scratch using the latest version of the codes and methodology as well as a consistent B3LYP level of theory throughout (instead of the mixed set of methods used in the earlier study). In particular, the version of CrystalPredictor used here includes an improved surrogate model (Local Approximate Model or LAM) that offers greater accuracy and speed through the use of adaptive LAM point generation<sup>3</sup> and LAM smoothing.<sup>4</sup> These stages are described in greater detail below.

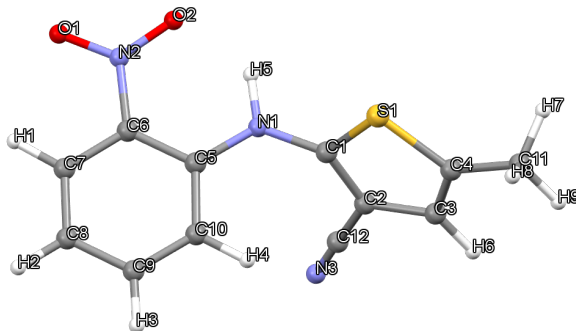

**Figure S1:** Atomic labeling for ROY corresponding to the discussion below.

**Stage I: Isolated molecule studies.** The gas-phase molecular geometry of ROY was first optimized at the B3LYP/6-31G(d,p) level of theory using Gaussian 09.<sup>5</sup> Based on the insight gained from a previous ROY study,<sup>2</sup> two conformational degrees of freedom were chosen as independent variables for the purpose of lattice energy minimization at the global search stage, namely C6-C5-N1-C1 ( $\theta_1$ ) and C5-N1-C1-C2 ( $\theta_2$ ) (see Figure S1). Their feasible ranges were determined by selecting values for which the increase in intramolecular energy over that of the *in vacuo* conformation is lower than 20 kJ/mol in one-dimensional scans, giving  $\theta_1 \in [-20.0, 180.0]$  and  $\theta_2 \in [100.0, 260.0]$ . The adaptive Local Approximate Model (LAM) algorithm<sup>3</sup> was used to generate a database of 38 LAMs that describe the conformationally-dependent properties within this space, using an initial uniform grid generated with  $\Delta\theta = \pm 20^\circ$ . The high-energy ( $\Delta^*$ ) and accuracy cutoff ( $\Delta^{**}$ ) parameters were set to 20 kJ/mol and 1.0 kJ/mol, respectively.

**Stage II: Global crystal structure search.** The global search for low-energy minima on the  $Z'=1$  lattice energy surface was performed using CrystalPredictor II.<sup>6</sup> The smoothed intramolecular potential algorithm<sup>4</sup> was employed to describe intramolecular interactions

and point charges for electrostatic interactions, while  $r/d$  parameters were taken from the FIT potential set<sup>7-10</sup>. Two million minimizations in 61 space groups were carried out. Structures within 20 kJ/mol of the global minimum were clustered using the CSD Python API<sup>11</sup> to compute  $\text{RMSD}_{15}$  values.<sup>12</sup> If two structures are found to have an  $\text{RMSD}_{15}$  less than 0.3 Å, a lattice energy difference of less than 0.2 kJ/mol and a density difference of less than 1.0 kg/m<sup>3</sup>, the higher-energy structure is eliminated. This led to the identification of 2,869 distinct structures within 20 kJ/mol of the global minimum.

**Stage III: Crystal structure refinement with a transferable  $r/d$  potential:** CrystalOptimizer<sup>13</sup> was used to perform local minimizations of the lowest 1,000 structures determined at Stage II, at the B3LYP/6-31G(d,p) level of theory, with additional flexibility introduced (torsional angles C10-C5-N1-C1, O1-N2-C6-C5, O2-N2-C6-C5, H5-N1-C1-C2 and bond angles N1-C1-C2, C5-N1-C1, C10-C5-N1, O1-N2-C6, O2-N2-C6, H5-N1-C1). Electrostatic interactions were described using multipoles (up to hexadecapoles) while  $r/d$  potential parameters were taken from the FIT potential set.<sup>7-10</sup>

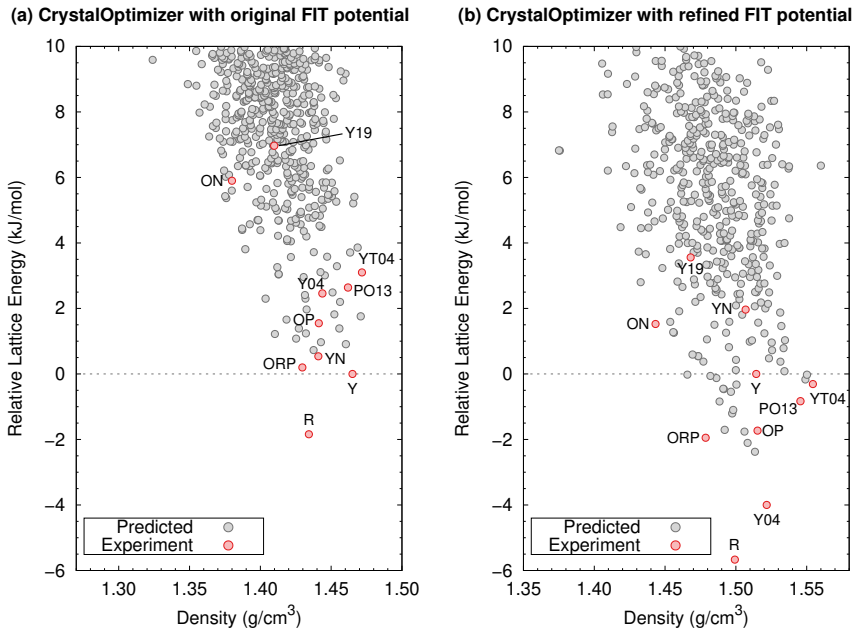

**Figure S2:** Comparison of the CSP landscapes before and after refinement of the FIT potential.

**Stage IV: Further crystal structure refinement with a tailored  $r/d$  potential:** The 50 lowest-energy structures from Stage III were fully relaxed with dispersion-corrected periodic planewave DFT calculation in QuantumEspresso<sup>14,15</sup> using the B86bPBE functional<sup>16,17</sup> and the exchange-dipole moment (XDM) dispersion correction.<sup>18</sup> This provided a set of optimized crystal geometries and energies which were then used as reference data for fitting an updated set of  $r/d$  potential parameters that are tailored to the ROY molecule. The CrystalEstimator<sup>19</sup> code was used for this purpose. The updated  $r/d$  parameter estimates, listed in Table 1, were then used to re-refine the lowest 1,000 structures from the global search at Stage II, using the same conformational degrees of freedom and electrostatic

model as at Stage III.

The final set of  $\sim 300$  structures carried forward represents the union of all structures which lie within 10 kJ/mol of the global minimum on either the Stage III or Stage IV landscapes, as indicated in Figure 2a of the main paper. This set was augmented with the structures of the three experimental polymorphs which have  $Z'=2$ : R05, R18, and RPL.

**Table S1:** Tailored Buckingham potential parameters for ROY at the B3LYP/6-31G(d,p) level of theory. The label ‘‘Hp’’ denotes hydrogen atoms bonded to polar electronegative atoms (O or N).

| Atom 1 | Atom2 | A (eV)   | B (Å)       | C (eV Å <sup>6</sup> ) |
|--------|-------|----------|-------------|------------------------|
| C      | C     | 2676.902 | 0.277777778 | 20.6113                |
| C      | H     | 290.8399 | 0.272479564 | 2.8769                 |
| C      | N     | 3084.705 | 0.27100271  | 18.4061                |
| C      | O     | 3886.035 | 0.264550265 | 22.7715                |
| C      | Hp    | 1984.116 | 0.242130751 | 0.0                    |
| C      | S     | 2534.239 | 0.289826    | 14.736                 |
| H      | H     | 38.4716  | 0.267379679 | 0.4447                 |
| H      | N     | 385.1455 | 0.265957447 | 5.658                  |
| H      | O     | 378.3938 | 0.25974026  | 4.9875                 |
| H      | Hp    | 33.3432  | 0.238095238 | 0.0                    |
| H      | S     | 757.0927 | 0.284063    | 16.1177                |
| N      | N     | 2796.711 | 0.264550265 | 38.0875                |
| N      | O     | 2112.153 | 0.258397933 | 2.7457                 |
| N      | Hp    | 395.0279 | 0.236966825 | 0.0                    |
| N      | S     | 2891.83  | 0.282458    | 37.1543                |
| O      | O     | 4753.345 | 0.252525253 | 32.9007                |
| O      | Hp    | 175.5761 | 0.232018562 | 0.0                    |
| O      | S     | 3042.481 | 0.275455    | 21.326                 |
| Hp     | Hp    | 62607.3  | 0.214592275 | 0.0                    |
| Hp     | S     | 2235.112 | 0.251234    | 0.0                    |
| S      | S     | 4086.27  | 0.302966    | 40.0768                |

**Stage V: DFT relaxation of the crystal structures.**

All  $\sim 300$  structures carried forward from Stages III and IV were fully relaxed with B86bPBE-XDM using Quantum Espresso. After removal of duplicate structures which coalesced in the DFT optimizations, 264 unique structures remained.

The B86bPBE-XDM calculations employed a 50 Ry planewave energy cutoff and reciprocal space Monkhorst-Pack  $k$ -point grid densities of  $0.04 \text{ \AA}^{-1}$  or better. Core electrons were treated with the projector augmented wave (PAW) approach using potentials produced with Atomic v6.1.<sup>14</sup> The gas-phase DFT energies for the monomer conformational energy correction were computed with the same parameters in a periodic box with an intermolecular spacing of at least  $20 \text{ \AA}$  between any two periodic image atoms. Due to the large unit cell size, only the  $\Gamma$ -point was sampled in reciprocal space. The high-pressure calculations relaxed the structures under isotropic hydrostatic pressures ranging from 1–10 GPa.

### Stage VI: Conformational energy correction and final energy ranking.

Finally, given the known problems GGA (and many other) density functionals have describing the ROY conformations, the final landscape was obtained by applying a single-point monomer conformational energy correction at the SCS-MP2D level of theory to each crystal from Stage V. The corrected energy per unit cell is computed as,

$$E_{crystal}^{corrected} = E_{crystal}^{DFT} + \sum_i (E_{mon,i}^{SCS-MP2D} - E_{mon,i}^{DFT}) \quad (1)$$

Energies per molecule are obtained by dividing by  $Z$ . The final results are denoted as B86bPBE-XDM +  $\Delta$ SCS-MP2D. Here, the final energies were evaluated relative to that of form Y.

The SCS-MP2D calculations were performed using PSI4<sup>20</sup> (for MP2) and a custom implementation of the spin-component scaling and dispersion correction.<sup>21</sup> The SCS-MP2D energy at the complete-basis-set (CBS) limit is computed as the HF/aug-cc-pVQZ energy plus the scaled same-spin and opposite-spin MP2/CBS correlation energies. We then subtract the correspondingly scaled amounts of same- and opposite-spin uncoupled Hartree-Fock (UCHF) dispersion energies and replace them with the full, unscaled coupled Kohn-Sham (CKS) dispersion energy. See Ref 22 for details of these corrections and the values of the  $c_{os}$  and  $c_{ss}$  coefficients.

$$E_{CBS}^{SCS-MP2D} = E_{aQZ}^{HF} + c_{os} E_{CBS}^{MP2,os} + c_{ss} E_{CBS}^{MP2,ss} - c_{os} E_{UCHF}^{disp,os} - c_{ss} E_{UCHF}^{disp,ss} + E_{CKS}^{disp,tot} \quad (2)$$

The complete-basis-set (CBS)-limit same-spin and opposite-spin correlation energies were extrapolated<sup>23</sup> from density-fitted MP2 calculations performed in the aug-cc-pVTZ and aug-cc-pVQZ basis sets:

$$E_{CBS}^{MP2,ss} = \frac{4^3 E_{aQZ}^{MP2,ss} - 3^3 E_{aTZ}^{MP2,ss}}{4^3 - 3^3} \quad E_{CBS}^{MP2,os} = \frac{4^3 E_{aQZ}^{MP2,os} - 3^3 E_{aTZ}^{MP2,os}}{4^3 - 3^3} \quad (3)$$

## S2 Additional Data

### S2.1 Comparison of DFT and experimental crystal structures

Table S2 compares the DFT-optimized crystal structures against experimental ones reported in the Cambridge Structure Database in terms of densities and structure overlays. Fifteen-molecule structure overlays were used for the comparison (RMSD<sub>15</sub> metric), as implemented in Mercury. The densities of the structures optimized with B86bPBE-XDM are consistently higher than experimental ones due to the neglect of zero-point vibrational energy and the thermal expansion of the crystals at finite temperatures. Most of the experimental structures were determined at room temperature, though a few were taken at lower temperatures, as indicated in the Table. The role of thermal expansion can be seen in the fact that the density differences between the experimental and DFT crystal structures are about twice as large for the polymorphs whose experimental structures were solved at room temperature compared to those solved at 100–150 K.

**Table S2:** Comparison of experimental and DFT-optimized crystal structures of ROY based on density and the rmsd<sub>15</sub> metric. The CSD RefCodes and experimental temperatures are provided.

| Polymorph | CSD RefCode | Temperature | Density (g/cm <sup>3</sup> ) |       | rmsd <sub>15</sub> (Å) |
|-----------|-------------|-------------|------------------------------|-------|------------------------|
|           |             |             | Expt.                        | DFT   |                        |
| Y         | QAXMEH22    | Room Temp   | 1.448                        | 1.537 | 0.221 Å                |
| YT04      | QAXMEH12    | Room Temp   | 1.473                        | 1.557 | 0.224 Å                |
| R         | QAXMEH02    | Room Temp   | 1.438                        | 1.520 | 0.166 Å                |
| OP        | QAXMEH03    | Room Temp   | 1.435                        | 1.539 | 0.204 Å                |
| YN        | QAXMEH04    | Room Temp   | 1.431                        | 1.518 | 0.238 Å                |
| Y04       | QAXMEH53    | 100 K       | 1.493                        | 1.539 | 0.168 Å                |
| R05       | QAXMEH31    | 250 K       | 1.434                        | 1.522 | 0.206 Å                |
| PO13      | QAXMEH52    | Room Temp   | 1.458                        | 1.569 | 0.259 Å                |
| ON        | QAXMEH      | Room Temp   | 1.428                        | 1.521 | 0.221 Å                |
| ORP       | QAXMEH05    | Room Temp   | 1.429                        | 1.508 | 0.198 Å                |
| R18       | QAXMEH57    | 150 K       | 1.480                        | 1.521 | 0.068 Å                |
| Y19       | QAXMEH60    | 100 K       | 1.470                        | 1.510 | 0.214 Å                |

**Mean +/- Std Dev: 0.225 ± 0.079 Å**

## S2.2 ROY conformational energy profile

Figure S3 plots the key gas-phase conformational energy profile for ROY. It shows how a GGA functional like B86bPBE-XDM over-stabilizes the more planar conformations, including those associated with red and orange polymorphs, relative to those less-planar conformations associated with Y polymorphs. It exhibits a root-mean-square (rms) error of 2.5 kJ/mol relative to complete-basis-set CCSD(T) benchmarks.<sup>24</sup> In contrast, complete-basis-set SCS-MP2D performs much better, with an rms error of 0.5 kJ/mol. See earlier studies for more examples of how DFT delocalization error impacts the conformational energies.<sup>24–27</sup>

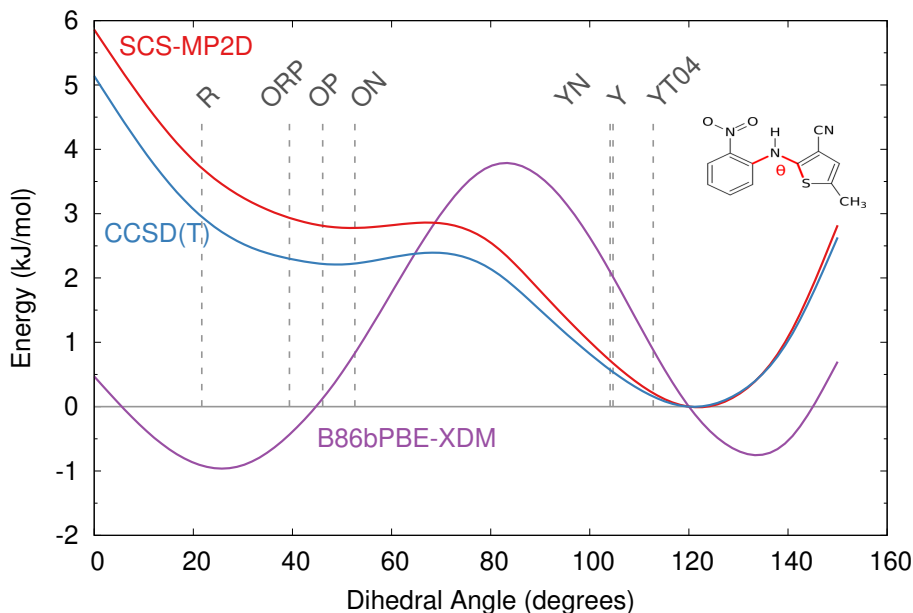

**Figure S3:** Conformational energy profile for rotating the key S-C-N-C dihedral angle  $\theta$ . The experimental dihedral angles associated with several ROY polymorphs are indicated.

### S2.3 Relative energies of the ROY polymorphs

Table S3 lists the computed lattice energies and energies relative to form Y as computed with B86bPBE-XDM and after the SCS-MP2D monomer correction is applied. These relative energies correspond to the crystal energy landscapes presented in the main paper. The experimental polymorphs are indicated in bold, while the high-pressure candidate structure #15 is highlighted in red. A CIF file containing all crystal structures is provided separately.

**Table S3:** Computed lattice and relative ROY polymorph energies as computed with B86bPBE-XDM before and after the SCS-MP2D monomer conformational energy correction is applied. Relative energies are computed relative to form Y.

| Structure Rank | Polymorph          | Space Group                                     | Density (g/cm <sup>3</sup> ) | B86bPBE-XDM         |                    | SCS-MP2D-corrected  |                    |
|----------------|--------------------|-------------------------------------------------|------------------------------|---------------------|--------------------|---------------------|--------------------|
|                |                    |                                                 |                              | $E_{latt}$ (kJ/mol) | $E_{rel}$ (kJ/mol) | $E_{latt}$ (kJ/mol) | $E_{rel}$ (kJ/mol) |
| <b>0001</b>    | <b>Y</b>           | <i>P21/n</i>                                    | <b>1.5366</b>                | <b>-123.16</b>      | <b>0.000</b>       | <b>-128.25</b>      | <b>0.000</b>       |
| <b>0002</b>    | <b>YT04</b>        | <i>P21/n</i>                                    | <b>1.5573</b>                | <b>-123.60</b>      | <b>-0.440</b>      | <b>-127.61</b>      | <b>0.642</b>       |
| <b>0003</b>    | <b>R</b>           | <i>P<math>\bar{1}</math></i>                    | <b>1.5196</b>                | <b>-129.55</b>      | <b>-6.388</b>      | <b>-127.42</b>      | <b>0.825</b>       |
| <b>0004</b>    | <b>OP</b>          | <i>P21/n</i>                                    | <b>1.5392</b>                | <b>-126.96</b>      | <b>-3.802</b>      | <b>-126.64</b>      | <b>1.607</b>       |
| <b>0005</b>    | <b>YN</b>          | <i>P<math>\bar{1}</math></i>                    | <b>1.5183</b>                | <b>-122.23</b>      | <b>0.930</b>       | <b>-125.94</b>      | <b>2.313</b>       |
| <b>0006</b>    | <b>Y04</b>         | <i>P<math>\bar{1}</math></i>                    | <b>1.5386</b>                | <b>-124.90</b>      | <b>-1.740</b>      | <b>-125.83</b>      | <b>2.417</b>       |
| <b>0007</b>    | <b>R05</b>         | <i>P2<sub>1</sub></i>                           | <b>1.5222</b>                | <b>-129.64</b>      | <b>-6.479</b>      | <b>-125.64</b>      | <b>2.607</b>       |
| 0008           |                    | <i>Pbca</i>                                     | 1.5038                       | -123.09             | 0.069              | -125.57             | 2.682              |
| 0009           |                    | <i>P<math>\bar{1}</math></i>                    | 1.5330                       | -122.40             | 0.761              | -125.54             | 2.706              |
| <b>0010</b>    | <b>PO13</b>        | <i>P21/c</i>                                    | <b>1.5686</b>                | <b>-127.64</b>      | <b>-4.474</b>      | <b>-125.45</b>      | <b>2.799</b>       |
| 0011           |                    | <i>P21/c</i>                                    | 1.5307                       | -121.91             | 1.251              | -125.28             | 2.972              |
| <b>0012</b>    | <b>ON</b>          | <i>P21/c</i>                                    | <b>1.5208</b>                | <b>-127.44</b>      | <b>-4.280</b>      | <b>-125.23</b>      | <b>3.016</b>       |
| 0013           |                    | <i>P<math>\bar{1}</math></i>                    | 1.5247                       | -126.55             | -3.392             | -125.20             | 3.045              |
| 0014           |                    | <i>P21/c</i>                                    | 1.5376                       | -127.97             | -4.808             | -124.86             | 3.392              |
| <b>0015</b>    | <b>High Press.</b> | <i>P21/n</i>                                    | <b>1.5502</b>                | <b>-120.75</b>      | <b>2.413</b>       | <b>-124.60</b>      | <b>3.644</b>       |
| 0016           |                    | <i>P2<sub>1</sub>2<sub>1</sub>2<sub>1</sub></i> | 1.5045                       | -120.57             | 2.595              | -124.50             | 3.747              |
| 0017           |                    | <i>P2<sub>1</sub>2<sub>1</sub>2<sub>1</sub></i> | 1.5449                       | -130.88             | -7.721             | -124.46             | 3.785              |
| 0018           |                    | <i>C2/c</i>                                     | 1.5404                       | -126.67             | -3.507             | -124.12             | 4.124              |
| 0019           |                    | <i>P21/c</i>                                    | 1.5226                       | -127.87             | -4.709             | -124.08             | 4.167              |
| 0020           |                    | <i>P21/n</i>                                    | 1.4907                       | -121.81             | 1.349              | -124.01             | 4.239              |
| 0021           |                    | <i>P21/c</i>                                    | 1.5430                       | -126.78             | -3.613             | -124.01             | 4.241              |
| 0022           |                    | <i>P21/c</i>                                    | 1.5541                       | -126.70             | -3.534             | -123.99             | 4.258              |
| <b>0023</b>    | <b>ORP</b>         | <i>Pbca</i>                                     | <b>1.5081</b>                | <b>-127.85</b>      | <b>-4.684</b>      | <b>-123.96</b>      | <b>4.290</b>       |
| 0024           |                    | <i>P21/c</i>                                    | 1.5176                       | -124.48             | -1.314             | -123.88             | 4.371              |
| 0025           |                    | <i>P<math>\bar{1}</math></i>                    | 1.5689                       | -127.27             | -4.108             | -123.79             | 4.460              |
| 0026           |                    | <i>P21/c</i>                                    | 1.5269                       | -119.72             | 3.446              | -123.78             | 4.469              |
| 0027           |                    | <i>P21/c</i>                                    | 1.5169                       | -119.67             | 3.492              | -123.73             | 4.516              |
| 0028           |                    | <i>P21/n</i>                                    | 1.5479                       | -129.91             | -6.751             | -123.66             | 4.593              |
| 0029           |                    | <i>P21/c</i>                                    | 1.5638                       | -125.70             | -2.541             | -123.53             | 4.723              |
| 0030           |                    | <i>P21/n</i>                                    | 1.5642                       | -126.97             | -3.806             | -123.50             | 4.749              |
| 0031           |                    | <i>C2/c</i>                                     | 1.5197                       | -124.39             | -1.227             | -123.50             | 4.751              |
| <b>0032</b>    | <b>R18</b>         | <i>P<math>\bar{1}</math></i>                    | <b>1.5207</b>                | <b>-130.03</b>      | <b>-6.871</b>      | <b>-123.39</b>      | <b>4.860</b>       |
| 0033           |                    | <i>P21/c</i>                                    | 1.5199                       | -125.96             | -2.795             | -123.38             | 4.868              |
| 0034           |                    | <i>P21/c</i>                                    | 1.4742                       | -119.23             | 3.931              | -123.26             | 4.992              |
| 0035           |                    | <i>P21/c</i>                                    | 1.5572                       | -126.40             | -3.239             | -123.19             | 5.055              |
| 0036           |                    | <i>P21/c</i>                                    | 1.5193                       | -124.60             | -1.439             | -123.11             | 5.142              |
| <b>0037</b>    | <b>RPL</b>         | <i>Pbca</i>                                     | <b>1.5026</b>                | <b>-127.14</b>      | <b>-3.979</b>      | <b>-123.09</b>      | <b>5.160</b>       |

Continued on next page



Continued from previous page

| Structure Rank | Polymorph  | Space Group                                     | Density (g/cm <sup>3</sup> ) | B86bPBE-XDM         |                    | SCS-MP2D-corrected  |                    |
|----------------|------------|-------------------------------------------------|------------------------------|---------------------|--------------------|---------------------|--------------------|
|                |            |                                                 |                              | $E_{latt}$ (kJ/mol) | $E_{rel}$ (kJ/mol) | $E_{latt}$ (kJ/mol) | $E_{rel}$ (kJ/mol) |
| 0038           |            | <i>P21/c</i>                                    | 1.5015                       | -118.89             | 4.276              | -123.01             | 5.236              |
| 0039           |            | <i>Fdd2</i>                                     | 1.5349                       | -124.06             | -0.894             | -123.00             | 5.252              |
| 0040           |            | <i>P2<sub>1</sub>2<sub>1</sub>2<sub>1</sub></i> | 1.4867                       | -125.38             | -2.214             | -122.98             | 5.269              |
| 0041           |            | <i>P21/c</i>                                    | 1.5464                       | -123.72             | -0.557             | -122.94             | 5.309              |
| 0042           |            | <i>P21/n</i>                                    | 1.5260                       | -119.00             | 4.163              | -122.81             | 5.436              |
| 0043           |            | <i>P21/n</i>                                    | 1.4976                       | -128.84             | -5.678             | -122.78             | 5.465              |
| 0044           |            | <i>P21/c</i>                                    | 1.5129                       | -125.89             | -2.724             | -122.64             | 5.610              |
| 0045           |            | <i>P2<sub>1</sub>2<sub>1</sub>2<sub>1</sub></i> | 1.5277                       | -125.75             | -2.584             | -122.63             | 5.615              |
| 0046           |            | <i>P21/c</i>                                    | 1.5372                       | -126.60             | -3.434             | -122.60             | 5.650              |
| 0047           |            | <i>P21/c</i>                                    | 1.5057                       | -127.00             | -3.834             | -122.59             | 5.658              |
| 0048           |            | $P\bar{1}$                                      | 1.5271                       | -122.71             | 0.451              | -122.56             | 5.693              |
| 0049           |            | <i>P21/c</i>                                    | 1.5071                       | -122.91             | 0.253              | -122.51             | 5.737              |
| 0050           |            | $P\bar{1}$                                      | 1.5283                       | -122.46             | 0.698              | -122.50             | 5.753              |
| 0051           |            | <i>I2</i>                                       | 1.5055                       | -122.02             | 1.142              | -122.48             | 5.766              |
| 0052           |            | <i>P21/n</i>                                    | 1.4859                       | -120.95             | 2.209              | -122.46             | 5.791              |
| 0053           |            | $P\bar{1}$                                      | 1.4957                       | -123.35             | -0.185             | -122.45             | 5.800              |
| 0054           |            | <i>P2<sub>1</sub>2<sub>1</sub>2</i>             | 1.5349                       | -124.41             | -1.244             | -122.45             | 5.802              |
| 0055           |            | <i>Pbca</i>                                     | 1.4847                       | -120.54             | 2.619              | -122.42             | 5.829              |
| 0056           |            | <i>P21/c</i>                                    | 1.5171                       | -124.80             | -1.635             | -122.28             | 5.965              |
| 0057           |            | <i>P21/n</i>                                    | 1.5252                       | -128.06             | -4.899             | -122.24             | 6.007              |
| 0058           |            | <i>Pbcn</i>                                     | 1.5427                       | -122.48             | 0.685              | -122.21             | 6.042              |
| 0059           |            | $P\bar{1}$                                      | 1.5098                       | -120.79             | 2.376              | -122.17             | 6.075              |
| 0060           |            | <i>P21/n</i>                                    | 1.4904                       | -123.98             | -0.815             | -122.16             | 6.088              |
| 0061           |            | <i>Pbca</i>                                     | 1.4961                       | -119.53             | 3.637              | -122.12             | 6.132              |
| 0062           |            | <i>P21/n</i>                                    | 1.4961                       | -119.40             | 3.763              | -122.08             | 6.168              |
| 0063           |            | <i>P21/c</i>                                    | 1.5226                       | -122.31             | 0.848              | -122.07             | 6.182              |
| 0064           |            | <i>P21/n</i>                                    | 1.5152                       | -120.00             | 3.162              | -122.01             | 6.238              |
| 0065           |            | <i>P21/c</i>                                    | 1.5216                       | -122.53             | 0.635              | -121.96             | 6.286              |
| 0066           |            | <i>P21/c</i>                                    | 1.5317                       | -125.41             | -2.249             | -121.93             | 6.322              |
| 0067           |            | <i>P21/c</i>                                    | 1.4905                       | -118.53             | 4.637              | -121.75             | 6.497              |
| 0068           |            | $P\bar{1}$                                      | 1.5377                       | -127.01             | -3.849             | -121.75             | 6.501              |
| 0069           |            | <i>P21/n</i>                                    | 1.5390                       | -127.25             | -4.092             | -121.73             | 6.516              |
| 0070           |            | $P\bar{1}$                                      | 1.5220                       | -126.72             | -3.559             | -121.66             | 6.591              |
| 0071           |            | <i>C2/c</i>                                     | 1.4921                       | -120.63             | 2.529              | -121.64             | 6.604              |
| <b>0072</b>    | <b>Y19</b> | <i>P21/c</i>                                    | <b>1.5104</b>                | <b>-122.66</b>      | <b>0.504</b>       | <b>-121.64</b>      | <b>6.606</b>       |
| 0073           |            | <i>P21/c</i>                                    | 1.5174                       | -127.81             | -4.650             | -121.59             | 6.654              |
| 0074           |            | <i>P21/n</i>                                    | 1.4931                       | -117.89             | 5.268              | -121.59             | 6.662              |
| 0075           |            | <i>Aba2</i>                                     | 1.5005                       | -116.70             | 6.461              | -121.51             | 6.736              |
| 0076           |            | <i>C2/c</i>                                     | 1.5165                       | -118.75             | 4.415              | -121.50             | 6.745              |
| 0077           |            | <i>I2/c</i>                                     | 1.5538                       | -124.96             | -1.801             | -121.45             | 6.797              |
| 0078           |            | <i>C2/c</i>                                     | 1.5401                       | -124.13             | -0.972             | -121.44             | 6.805              |
| 0079           |            | <i>Fdd2</i>                                     | 1.5344                       | -123.07             | 0.097              | -121.43             | 6.815              |
| 0080           |            | <i>Pn</i>                                       | 1.5207                       | -118.29             | 4.873              | -121.42             | 6.829              |
| 0081           |            | <i>P21/n</i>                                    | 1.4809                       | -119.57             | 3.596              | -121.40             | 6.853              |
| 0082           |            | <i>P21/c</i>                                    | 1.5042                       | -118.61             | 4.549              | -121.38             | 6.871              |
| 0083           |            | <i>P21/c</i>                                    | 1.5083                       | -121.31             | 1.857              | -121.35             | 6.895              |
| 0084           |            | <i>Pccn</i>                                     | 1.5169                       | -127.56             | -4.399             | -121.35             | 6.901              |
| 0085           |            | <i>C2/c</i>                                     | 1.5006                       | -125.97             | -2.809             | -121.33             | 6.916              |
| 0086           |            | <i>Pbca</i>                                     | 1.5119                       | -125.32             | -2.158             | -121.33             | 6.919              |

Continued on next page

Continued from previous page

| Structure Rank | Polymorph | Space Group                                     | Density (g/cm <sup>3</sup> ) | B86bPBE-XDM         |                    | SCS-MP2D-corrected  |                    |
|----------------|-----------|-------------------------------------------------|------------------------------|---------------------|--------------------|---------------------|--------------------|
|                |           |                                                 |                              | $E_{latt}$ (kJ/mol) | $E_{rel}$ (kJ/mol) | $E_{latt}$ (kJ/mol) | $E_{rel}$ (kJ/mol) |
| 0087           |           | <i>P1</i>                                       | 1.5243                       | -127.28             | -4.119             | -121.29             | 6.955              |
| 0088           |           | <i>I2/c</i>                                     | 1.5041                       | -121.62             | 1.543              | -121.29             | 6.957              |
| 0089           |           | <i>P21/c</i>                                    | 1.5155                       | -125.29             | -2.129             | -121.29             | 6.958              |
| 0090           |           | $\bar{P}1$                                      | 1.4904                       | -118.90             | 4.266              | -121.26             | 6.986              |
| 0091           |           | <i>P21/n</i>                                    | 1.5260                       | -117.32             | 5.840              | -121.26             | 6.990              |
| 0092           |           | <i>Pbcn</i>                                     | 1.5091                       | -119.86             | 3.300              | -121.25             | 6.995              |
| 0093           |           | <i>P21/c</i>                                    | 1.4947                       | -116.19             | 6.971              | -121.21             | 7.038              |
| 0094           |           | <i>P21/n</i>                                    | 1.5482                       | -123.97             | -0.806             | -121.14             | 7.110              |
| 0095           |           | <i>Fdd2</i>                                     | 1.5076                       | -124.53             | -1.368             | -121.10             | 7.147              |
| 0096           |           | <i>P21/c</i>                                    | 1.5054                       | -118.86             | 4.306              | -121.10             | 7.153              |
| 0097           |           | $\bar{P}1$                                      | 1.4983                       | -121.03             | 2.128              | -121.09             | 7.162              |
| 0098           |           | <i>P21/n</i>                                    | 1.4855                       | -118.07             | 5.092              | -121.05             | 7.201              |
| 0099           |           | <i>P21/n</i>                                    | 1.4890                       | -118.12             | 5.045              | -121.02             | 7.231              |
| 0100           |           | <i>P21/n</i>                                    | 1.5220                       | -126.93             | -3.764             | -120.97             | 7.279              |
| 0101           |           | <i>Pca2<sub>1</sub></i>                         | 1.5263                       | -122.96             | 0.201              | -120.89             | 7.362              |
| 0102           |           | <i>P21/c</i>                                    | 1.4791                       | -117.58             | 5.582              | -120.76             | 7.492              |
| 0103           |           | <i>Cc</i>                                       | 1.4837                       | -124.13             | -0.970             | -120.72             | 7.532              |
| 0104           |           | <i>P21/c</i>                                    | 1.5023                       | -117.97             | 5.194              | -120.67             | 7.579              |
| 0105           |           | <i>P21/c</i>                                    | 1.4932                       | -118.23             | 4.935              | -120.66             | 7.586              |
| 0106           |           | <i>P21/c</i>                                    | 1.5138                       | -122.52             | 0.642              | -120.64             | 7.605              |
| 0107           |           | <i>Fdd2</i>                                     | 1.5210                       | -123.41             | -0.244             | -120.64             | 7.609              |
| 0108           |           | <i>P21/c</i>                                    | 1.4979                       | -125.27             | -2.106             | -120.62             | 7.627              |
| 0109           |           | <i>P21/c</i>                                    | 1.4762                       | -118.37             | 4.792              | -120.48             | 7.765              |
| 0110           |           | <i>P21/c</i>                                    | 1.5228                       | -118.22             | 4.946              | -120.46             | 7.784              |
| 0111           |           | <i>Pbca</i>                                     | 1.4655                       | -122.25             | 0.912              | -120.46             | 7.790              |
| 0112           |           | <i>C2/c</i>                                     | 1.5173                       | -126.80             | -3.639             | -120.45             | 7.803              |
| 0113           |           | <i>C2/c</i>                                     | 1.5299                       | -125.89             | -2.727             | -120.44             | 7.813              |
| 0114           |           | <i>Pna2<sub>1</sub></i>                         | 1.4819                       | -122.60             | 0.559              | -120.40             | 7.853              |
| 0115           |           | <i>P21/c</i>                                    | 1.5432                       | -122.60             | 0.558              | -120.35             | 7.900              |
| 0116           |           | <i>P21/n</i>                                    | 1.5525                       | -123.44             | -0.277             | -120.30             | 7.948              |
| 0117           |           | <i>Pna2<sub>1</sub></i>                         | 1.4865                       | -119.54             | 3.627              | -120.18             | 8.069              |
| 0118           |           | $\bar{P}1$                                      | 1.5316                       | -126.86             | -3.699             | -120.18             | 8.069              |
| 0119           |           | <i>P21/n</i>                                    | 1.4861                       | -119.09             | 4.072              | -120.18             | 8.073              |
| 0120           |           | <i>P21/c</i>                                    | 1.5348                       | -126.06             | -2.894             | -120.11             | 8.134              |
| 0121           |           | <i>I2</i>                                       | 1.4854                       | -119.59             | 3.577              | -120.10             | 8.152              |
| 0122           |           | <i>Pccn</i>                                     | 1.5439                       | -123.94             | -0.781             | -120.09             | 8.163              |
| 0123           |           | <i>P21/c</i>                                    | 1.5404                       | -123.82             | -0.661             | -120.08             | 8.166              |
| 0124           |           | <i>Fdd2</i>                                     | 1.4726                       | -126.26             | -3.095             | -120.08             | 8.169              |
| 0125           |           | <i>Pccn</i>                                     | 1.4883                       | -124.32             | -1.157             | -120.04             | 8.211              |
| 0126           |           | <i>C2/c</i>                                     | 1.5269                       | -118.26             | 4.902              | -120.03             | 8.216              |
| 0127           |           | <i>P21/n</i>                                    | 1.5089                       | -120.63             | 2.536              | -120.01             | 8.239              |
| 0128           |           | <i>P21/n</i>                                    | 1.4878                       | -125.76             | -2.601             | -119.98             | 8.272              |
| 0129           |           | $\bar{P}1$                                      | 1.5334                       | -126.97             | -3.803             | -119.96             | 8.285              |
| 0130           |           | <i>Pbcn</i>                                     | 1.5065                       | -120.91             | 2.251              | -119.95             | 8.295              |
| 0131           |           | <i>P2<sub>1</sub>2<sub>1</sub>2<sub>1</sub></i> | 1.5131                       | -124.72             | -1.561             | -119.79             | 8.459              |
| 0132           |           | $\bar{P}1$                                      | 1.4960                       | -125.71             | -2.543             | -119.78             | 8.468              |
| 0133           |           | <i>P21/n</i>                                    | 1.4950                       | -126.06             | -2.893             | -119.72             | 8.527              |
| 0134           |           | <i>Pbcn</i>                                     | 1.4746                       | -119.68             | 3.478              | -119.69             | 8.556              |
| 0135           |           | <i>P21/c</i>                                    | 1.5111                       | -118.36             | 4.800              | -119.67             | 8.578              |

Continued on next page

Continued from previous page

| Structure Rank | Polymorph | Space Group                                     | Density (g/cm <sup>3</sup> ) | B86bPBE-XDM         |                    | SCS-MP2D-corrected  |                    |
|----------------|-----------|-------------------------------------------------|------------------------------|---------------------|--------------------|---------------------|--------------------|
|                |           |                                                 |                              | $E_{latt}$ (kJ/mol) | $E_{rel}$ (kJ/mol) | $E_{latt}$ (kJ/mol) | $E_{rel}$ (kJ/mol) |
| 0136           |           | <i>P21/n</i>                                    | 1.4961                       | -118.10             | 5.063              | -119.65             | 8.595              |
| 0137           |           | <i>P21/n</i>                                    | 1.5118                       | -126.46             | -3.293             | -119.54             | 8.704              |
| 0138           |           | $P\bar{1}$                                      | 1.5002                       | -124.25             | -1.090             | -119.53             | 8.721              |
| 0139           |           | $P\bar{1}$                                      | 1.5304                       | -118.76             | 4.403              | -119.49             | 8.760              |
| 0140           |           | <i>P21/n</i>                                    | 1.4909                       | -125.12             | -1.953             | -119.48             | 8.771              |
| 0141           |           | <i>I2/a</i>                                     | 1.5541                       | -122.82             | 0.343              | -119.45             | 8.801              |
| 0142           |           | <i>Pnna</i>                                     | 1.4681                       | -121.11             | 2.057              | -119.43             | 8.819              |
| 0143           |           | <i>P2<sub>1</sub>2<sub>1</sub>2<sub>1</sub></i> | 1.5372                       | -123.27             | -0.107             | -119.42             | 8.831              |
| 0144           |           | <i>P21/c</i>                                    | 1.4995                       | -123.95             | -0.786             | -119.39             | 8.860              |
| 0145           |           | <i>I2</i>                                       | 1.5294                       | -120.98             | 2.185              | -119.34             | 8.909              |
| 0146           |           | $P\bar{1}$                                      | 1.4797                       | -118.96             | 4.203              | -119.32             | 8.925              |
| 0147           |           | <i>I2/c</i>                                     | 1.4766                       | -118.60             | 4.567              | -119.31             | 8.938              |
| 0148           |           | <i>P2<sub>1</sub></i>                           | 1.5029                       | -122.70             | 0.465              | -119.31             | 8.943              |
| 0149           |           | <i>Pbca</i>                                     | 1.4654                       | -122.07             | 1.095              | -119.25             | 8.995              |
| 0150           |           | <i>C2/c</i>                                     | 1.5322                       | -122.47             | 0.694              | -119.24             | 9.006              |
| 0151           |           | <i>Pna2<sub>1</sub></i>                         | 1.4942                       | -121.52             | 1.640              | -119.21             | 9.041              |
| 0152           |           | <i>P21/c</i>                                    | 1.5274                       | -118.11             | 5.053              | -119.21             | 9.043              |
| 0153           |           | <i>Pna2<sub>1</sub></i>                         | 1.5259                       | -124.56             | -1.402             | -119.16             | 9.084              |
| 0154           |           | <i>P21/n</i>                                    | 1.5169                       | -121.31             | 1.851              | -119.08             | 9.173              |
| 0155           |           | <i>C2/c</i>                                     | 1.5075                       | -125.38             | -2.213             | -119.00             | 9.246              |
| 0156           |           | <i>C2/c</i>                                     | 1.4988                       | -118.82             | 4.346              | -118.98             | 9.269              |
| 0157           |           | <i>Pc</i>                                       | 1.5065                       | -117.45             | 5.711              | -118.95             | 9.299              |
| 0158           |           | <i>Fdd2</i>                                     | 1.5407                       | -121.84             | 1.321              | -118.91             | 9.335              |
| 0159           |           | <i>Pbca</i>                                     | 1.4813                       | -120.50             | 2.667              | -118.89             | 9.357              |
| 0160           |           | <i>P21/c</i>                                    | 1.4797                       | -116.51             | 6.652              | -118.83             | 9.418              |
| 0161           |           | <i>P21/n</i>                                    | 1.5043                       | -116.99             | 6.171              | -118.79             | 9.463              |
| 0162           |           | <i>C2/c</i>                                     | 1.5440                       | -122.18             | 0.987              | -118.78             | 9.470              |
| 0163           |           | <i>Pbca</i>                                     | 1.4591                       | -124.74             | -1.575             | -118.77             | 9.474              |
| 0164           |           | <i>P2<sub>1</sub></i>                           | 1.5033                       | -116.96             | 6.204              | -118.68             | 9.570              |
| 0165           |           | $P\bar{1}$                                      | 1.5088                       | -124.98             | -1.820             | -118.66             | 9.592              |
| 0166           |           | <i>P21/c</i>                                    | 1.5040                       | -117.92             | 5.244              | -118.56             | 9.688              |
| 0167           |           | <i>P21/c</i>                                    | 1.4924                       | -122.02             | 1.141              | -118.52             | 9.732              |
| 0168           |           | <i>C2/c</i>                                     | 1.5501                       | -120.82             | 2.338              | -118.44             | 9.813              |
| 0169           |           | <i>P2/n</i>                                     | 1.4721                       | -116.92             | 6.240              | -118.43             | 9.816              |
| 0170           |           | <i>P21/c</i>                                    | 1.4795                       | -117.55             | 5.609              | -118.42             | 9.825              |
| 0171           |           | <i>Pbca</i>                                     | 1.5259                       | -124.17             | -1.011             | -118.39             | 9.859              |
| 0172           |           | <i>C2/c</i>                                     | 1.4828                       | -114.59             | 8.574              | -118.33             | 9.917              |
| 0173           |           | <i>Cc</i>                                       | 1.5140                       | -115.58             | 7.582              | -118.27             | 9.979              |
| 0174           |           | $P\bar{1}$                                      | 1.4888                       | -124.46             | -1.294             | -118.26             | 9.991              |
| 0175           |           | <i>Pbcn</i>                                     | 1.4911                       | -113.44             | 9.718              | -118.22             | 10.029             |
| 0176           |           | <i>P21/n</i>                                    | 1.5517                       | -121.77             | 1.394              | -118.21             | 10.040             |
| 0177           |           | <i>Fdd2</i>                                     | 1.4809                       | -122.89             | 0.276              | -118.18             | 10.064             |
| 0178           |           | <i>I2</i>                                       | 1.5327                       | -120.57             | 2.592              | -118.18             | 10.072             |
| 0179           |           | <i>P21/c</i>                                    | 1.5173                       | -114.43             | 8.734              | -118.14             | 10.111             |
| 0180           |           | <i>C2/c</i>                                     | 1.5143                       | -124.17             | -1.012             | -118.13             | 10.115             |
| 0181           |           | <i>P21/c</i>                                    | 1.5041                       | -122.70             | 0.459              | -118.10             | 10.149             |
| 0182           |           | <i>P21/c</i>                                    | 1.4740                       | -117.44             | 5.719              | -118.04             | 10.204             |
| 0183           |           | <i>P21/n</i>                                    | 1.4750                       | -116.48             | 6.678              | -118.03             | 10.215             |
| 0184           |           | <i>P21/c</i>                                    | 1.4962                       | -117.21             | 5.948              | -118.01             | 10.242             |

Continued on next page

Continued from previous page

| Structure Rank | Polymorph | Space Group                                     | Density (g/cm <sup>3</sup> ) | B86bPBE-XDM         |                    | SCS-MP2D-corrected  |                    |
|----------------|-----------|-------------------------------------------------|------------------------------|---------------------|--------------------|---------------------|--------------------|
|                |           |                                                 |                              | $E_{latt}$ (kJ/mol) | $E_{rel}$ (kJ/mol) | $E_{latt}$ (kJ/mol) | $E_{rel}$ (kJ/mol) |
| 0185           |           | <i>Pna2<sub>1</sub></i>                         | 1.5419                       | -123.82             | -0.656             | -117.99             | 10.263             |
| 0186           |           | <i>C2/c</i>                                     | 1.5195                       | -123.62             | -0.458             | -117.96             | 10.284             |
| 0187           |           | <i>P21/n</i>                                    | 1.5062                       | -118.80             | 4.361              | -117.95             | 10.303             |
| 0188           |           | <i>P21/n</i>                                    | 1.5195                       | -119.30             | 3.866              | -117.92             | 10.331             |
| 0189           |           | <i>P21/c</i>                                    | 1.5243                       | -123.98             | -0.815             | -117.78             | 10.467             |
| 0190           |           | <i>P21/c</i>                                    | 1.5189                       | -122.15             | 1.013              | -117.76             | 10.487             |
| 0191           |           | <i>C2/c</i>                                     | 1.4621                       | -120.78             | 2.381              | -117.73             | 10.521             |
| 0192           |           | <i>C2/c</i>                                     | 1.5415                       | -121.19             | 1.976              | -117.70             | 10.551             |
| 0193           |           | <i>P21/n</i>                                    | 1.4801                       | -117.91             | 5.250              | -117.70             | 10.551             |
| 0194           |           | <i>Pnna</i>                                     | 1.4668                       | -123.80             | -0.641             | -117.64             | 10.608             |
| 0195           |           | <i>C2/c</i>                                     | 1.4900                       | -123.99             | -0.831             | -117.58             | 10.672             |
| 0196           |           | <i>P21/c</i>                                    | 1.4669                       | -121.51             | 1.651              | -117.55             | 10.694             |
| 0197           |           | <i>P21/n</i>                                    | 1.5155                       | -116.71             | 6.452              | -117.54             | 10.712             |
| 0198           |           | <i>Fdd2</i>                                     | 1.5197                       | -117.54             | 5.623              | -117.52             | 10.733             |
| 0199           |           | <i>P21/n</i>                                    | 1.4841                       | -121.19             | 1.973              | -117.51             | 10.737             |
| 0200           |           | <i>P2/n</i>                                     | 1.5488                       | -120.24             | 2.921              | -117.48             | 10.768             |
| 0201           |           | <i>P2<sub>1</sub>2<sub>1</sub>2<sub>1</sub></i> | 1.4844                       | -120.25             | 2.915              | -117.47             | 10.783             |
| 0202           |           | <i>Fdd2</i>                                     | 1.4791                       | -116.56             | 6.602              | -117.46             | 10.789             |
| 0203           |           | <i>P21/c</i>                                    | 1.4712                       | -117.93             | 5.232              | -117.42             | 10.828             |
| 0204           |           | <i>P21/c</i>                                    | 1.4710                       | -121.78             | 1.379              | -117.42             | 10.832             |
| 0205           |           | <i>C2/c</i>                                     | 1.4746                       | -118.16             | 5.003              | -117.40             | 10.848             |
| 0206           |           | <i>C2/c</i>                                     | 1.4800                       | -121.89             | 1.273              | -117.35             | 10.899             |
| 0207           |           | <i>I2/a</i>                                     | 1.4977                       | -117.41             | 5.755              | -117.32             | 10.925             |
| 0208           |           | <i>P21/c</i>                                    | 1.4977                       | -119.57             | 3.590              | -117.31             | 10.938             |
| 0209           |           | <i>P21/c</i>                                    | 1.5159                       | -124.72             | -1.558             | -117.27             | 10.975             |
| 0210           |           | <i>P21/n</i>                                    | 1.5287                       | -119.24             | 3.922              | -117.23             | 11.023             |
| 0211           |           | <i>P2/n</i>                                     | 1.5362                       | -119.26             | 3.905              | -117.22             | 11.025             |
| 0212           |           | <i>P21/c</i>                                    | 1.4930                       | -120.89             | 2.275              | -117.12             | 11.131             |
| 0213           |           | <i>C2/c</i>                                     | 1.4658                       | -115.34             | 7.820              | -117.06             | 11.190             |
| 0214           |           | <i>P21/n</i>                                    | 1.5234                       | -123.43             | -0.269             | -116.97             | 11.278             |
| 0215           |           | <i>P21/c</i>                                    | 1.4545                       | -120.62             | 2.540              | -116.92             | 11.329             |
| 0216           |           | <i>P21/c</i>                                    | 1.5038                       | -122.79             | 0.369              | -116.83             | 11.419             |
| 0217           |           | <i>P21/c</i>                                    | 1.4875                       | -122.34             | 0.826              | -116.81             | 11.436             |
| 0218           |           | <i>P2<sub>1</sub>2<sub>1</sub>2<sub>1</sub></i> | 1.4968                       | -122.82             | 0.343              | -116.80             | 11.445             |
| 0219           |           | <i>I2/c</i>                                     | 1.4760                       | -113.60             | 9.558              | -116.71             | 11.542             |
| 0220           |           | <i>P21/n</i>                                    | 1.4795                       | -114.52             | 8.643              | -116.66             | 11.588             |
| 0221           |           | <i>P<math>\bar{1}</math></i>                    | 1.5202                       | -123.06             | 0.106              | -116.63             | 11.623             |
| 0222           |           | <i>P21/n</i>                                    | 1.5082                       | -123.35             | -0.184             | -116.61             | 11.638             |
| 0223           |           | <i>I2/a</i>                                     | 1.5240                       | -114.81             | 8.352              | -116.58             | 11.664             |
| 0224           |           | <i>P21/c</i>                                    | 1.5285                       | -112.95             | 10.209             | -116.47             | 11.775             |
| 0225           |           | <i>C2/c</i>                                     | 1.5018                       | -120.89             | 2.271              | -116.31             | 11.941             |
| 0226           |           | <i>P21/c</i>                                    | 1.4405                       | -114.37             | 8.794              | -116.26             | 11.985             |
| 0227           |           | <i>Pbca</i>                                     | 1.5237                       | -123.20             | -0.033             | -116.07             | 12.180             |
| 0228           |           | <i>P<math>\bar{1}</math></i>                    | 1.4752                       | -112.56             | 10.598             | -116.03             | 12.215             |
| 0229           |           | <i>P<math>\bar{1}</math></i>                    | 1.4747                       | -117.44             | 5.727              | -115.96             | 12.286             |
| 0230           |           | <i>Aba2</i>                                     | 1.5054                       | -122.33             | 0.828              | -115.90             | 12.349             |
| 0231           |           | <i>P21/c</i>                                    | 1.4808                       | -122.09             | 1.074              | -115.72             | 12.532             |
| 0232           |           | <i>C2/c</i>                                     | 1.5236                       | -117.72             | 5.441              | -115.69             | 12.560             |
| 0233           |           | <i>P21/n</i>                                    | 1.4770                       | -121.57             | 1.588              | -115.61             | 12.634             |

Continued on next page

Continued from previous page

| Structure Rank | Polymorph | Space Group              | Density (g/cm <sup>3</sup> ) | B86bPBE-XDM         |                    | SCS-MP2D-corrected  |                    |
|----------------|-----------|--------------------------|------------------------------|---------------------|--------------------|---------------------|--------------------|
|                |           |                          |                              | $E_{latt}$ (kJ/mol) | $E_{rel}$ (kJ/mol) | $E_{latt}$ (kJ/mol) | $E_{rel}$ (kJ/mol) |
| 0234           |           | <i>Pna2</i> <sub>1</sub> | 1.4891                       | -120.61             | 2.550              | -115.61             | 12.634             |
| 0235           |           | <i>P</i> $\bar{1}$       | 1.5082                       | -115.38             | 7.780              | -115.57             | 12.677             |
| 0236           |           | <i>Pbca</i>              | 1.5108                       | -121.87             | 1.291              | -115.56             | 12.692             |
| 0237           |           | <i>P21/c</i>             | 1.4922                       | -121.90             | 1.265              | -115.55             | 12.702             |
| 0238           |           | <i>P21/c</i>             | 1.5105                       | -121.71             | 1.454              | -115.49             | 12.757             |
| 0239           |           | <i>Pbcn</i>              | 1.4897                       | -121.09             | 2.071              | -115.39             | 12.860             |
| 0240           |           | <i>I2/a</i>              | 1.5230                       | -121.28             | 1.884              | -115.36             | 12.886             |
| 0241           |           | <i>P2/n</i>              | 1.4628                       | -121.39             | 1.777              | -115.31             | 12.943             |
| 0242           |           | <i>P21/c</i>             | 1.5117                       | -111.31             | 11.857             | -115.18             | 13.071             |
| 0243           |           | <i>P21/n</i>             | 1.5270                       | -121.23             | 1.930              | -115.11             | 13.138             |
| 0244           |           | <i>P21/c</i>             | 1.4828                       | -120.82             | 2.338              | -115.08             | 13.165             |
| 0245           |           | <i>P21/n</i>             | 1.5030                       | -121.29             | 1.869              | -114.97             | 13.275             |
| 0246           |           | <i>Pbca</i>              | 1.5164                       | -114.09             | 9.072              | -114.89             | 13.354             |
| 0247           |           | <i>P21/c</i>             | 1.4897                       | -120.86             | 2.304              | -114.84             | 13.409             |
| 0248           |           | <i>P21/n</i>             | 1.4532                       | -111.15             | 12.016             | -114.82             | 13.426             |
| 0249           |           | <i>C2/c</i>              | 1.4773                       | -121.16             | 2.000              | -114.72             | 13.530             |
| 0250           |           | <i>P21/n</i>             | 1.5071                       | -121.75             | 1.417              | -114.68             | 13.567             |
| 0251           |           | <i>Pna2</i> <sub>1</sub> | 1.4566                       | -120.20             | 2.961              | -114.46             | 13.784             |
| 0252           |           | <i>C2/c</i>              | 1.5072                       | -119.93             | 3.236              | -114.43             | 13.823             |
| 0253           |           | <i>C2/c</i>              | 1.4840                       | -121.12             | 2.046              | -114.38             | 13.873             |
| 0254           |           | <i>P21/n</i>             | 1.4743                       | -112.56             | 10.606             | -114.03             | 14.219             |
| 0255           |           | <i>C2</i>                | 1.4752                       | -120.14             | 3.022              | -113.96             | 14.286             |
| 0256           |           | <i>Aba2</i>              | 1.5179                       | -112.64             | 10.522             | -113.85             | 14.402             |
| 0257           |           | <i>Pbca</i>              | 1.5211                       | -118.93             | 4.229              | -113.72             | 14.524             |
| 0258           |           | <i>Pbca</i>              | 1.4615                       | -110.24             | 12.920             | -113.31             | 14.938             |
| 0259           |           | <i>Ic</i>                | 1.4934                       | -118.25             | 4.916              | -113.01             | 15.242             |
| 0260           |           | <i>P21/c</i>             | 1.4635                       | -118.84             | 4.321              | -112.43             | 15.817             |
| 0261           |           | <i>Pbca</i>              | 1.4717                       | -109.29             | 13.869             | -112.12             | 16.133             |
| 0262           |           | <i>Pna2</i> <sub>1</sub> | 1.4632                       | -116.67             | 6.496              | -111.66             | 16.592             |
| 0263           |           | <i>C222</i> <sub>1</sub> | 1.4419                       | -117.22             | 5.944              | -111.50             | 16.748             |
| 0264           |           | <i>Pccn</i>              | 1.4381                       | -116.39             | 6.777              | -110.74             | 17.512             |

## S2.4 Analysis of CSP structures with $Z' = 2$

Nyman et al<sup>26</sup> performed a CSP study on ROY that searched over 19 space groups with  $Z'=2$  and 38 space groups with  $Z'=1$ . This landscape was using dispersion-corrected PBE DFT calculations and a DFT-tailored force field using the GRACE program. The authors published both their final optimized predicted structures as well optimized geometries for each of the experimental forms that were known at the time. The search was imperfect—it found only six experimental polymorphs. It was also heavily biased toward red/orange forms due to delocalization error in the PBE functional; only 2% of the structures in the final set exhibit an SCNC dihedral angle of  $90\pm 40^\circ$ , which is the approximate range associated with yellow polymorphs (as discussed in the main paper). In contrast, more than a third of the lower-energy structures reported in our search lie in that range.

Nevertheless, because our own search only examined  $Z'=1$  structures, the Nyman et al landscape enables assessment of the importance of  $Z'=2$  structures. We performed single-point B86bPBE-XDM energy calculations and applied the SCS-MP2D monomer energy correction to the 500 lowest-energy structures from their final landscape of 1,077 DFT-optimized structures. About three-quarters of these structures have  $Z'=2$ . Differences in the functionals and dispersion corrections between that study and our own leads to changes in crystal packing densities, intramolecular bond lengths, and overall energies that hinder direct comparison between the single-point energies for these structures and the energies from our own landscape. For example, the raw SCS-MP2D monomer energies for the experimental forms differ by up to 3.5 kJ/mol depending on which functional was used to optimize them. On the other hand, relative energies between forms are far more consistent across the two landscapes. Accordingly, Figure S4 presents the energies in each landscape relative to form Y from that same landscape, and the two landscapes are presented side-by-side.

Unsurprisingly, given the the PBE-NP results from Ref 26 and our B86bPBE-XDM data for our own landscape in the main paper, B86bPBE-XDM predicts the yellow forms on the Nyman et al landscape to be far less stable than both the red/orange experimental forms and most of the predicted structures. Performing the SCS-MP2D monomer correction transforms the landscape dramatically, and form Y becomes the most stable. As can be seen from Figure S4, the relative SCS-MP2D-corrected B86bPBE-XDM single-point energies of the experimental polymorphs are reasonably similar regardless of whether they are optimized with PBE-NP or B86bPBE-XDM. The energies of forms OP, ORP, PO13, R05, YN, and YT04 vs. Y vary by 0–0.3 kJ/mol between the two landscapes in Figures S4b and c. The exceptions are form ON, for which Nyman et al reported problems reproducing the experimental geometry with the PBE-NP model,<sup>26</sup> and form R, which is 0.9 kJ/mol less stable when optimized with PBE-NP.

Looking at the revised landscape after the conformational energy correction, we find few if any low-energy  $Z'=2$  structures which compete with the low-energy experimental forms. R05 remains the lowest-energy  $Z'=2$  structure. The next lowest predicted structure (Rank #19 in their list) with  $Z'=2$  lies only slightly above R05 in energy. However, this structure involves two distinct *ab*-plane layers which alternate intramolecular conformation and packing motif along the *c* direction. One of these 2-D layers is very similar to the packing found in form YN, and experimental realization of this structure might be inhibited by preferential crystallization of the more stable YN polymorph. The other  $Z'=2$  structures

lie in higher-energy regions of the landscape where many unobserved candidates lie and do not particularly stand out.

Overall this analysis of the CSP landscape from Ref 26 bolsters the argument in the main paper that the important low-energy polymorphs of ROY have already been found. It is worth reiterating, however, that this landscape is heavily biased toward more planar conformations of the ROY molecule, and the possibility of missing  $Z' = 2$  structures with yellow-color conformations cannot currently be ruled out.

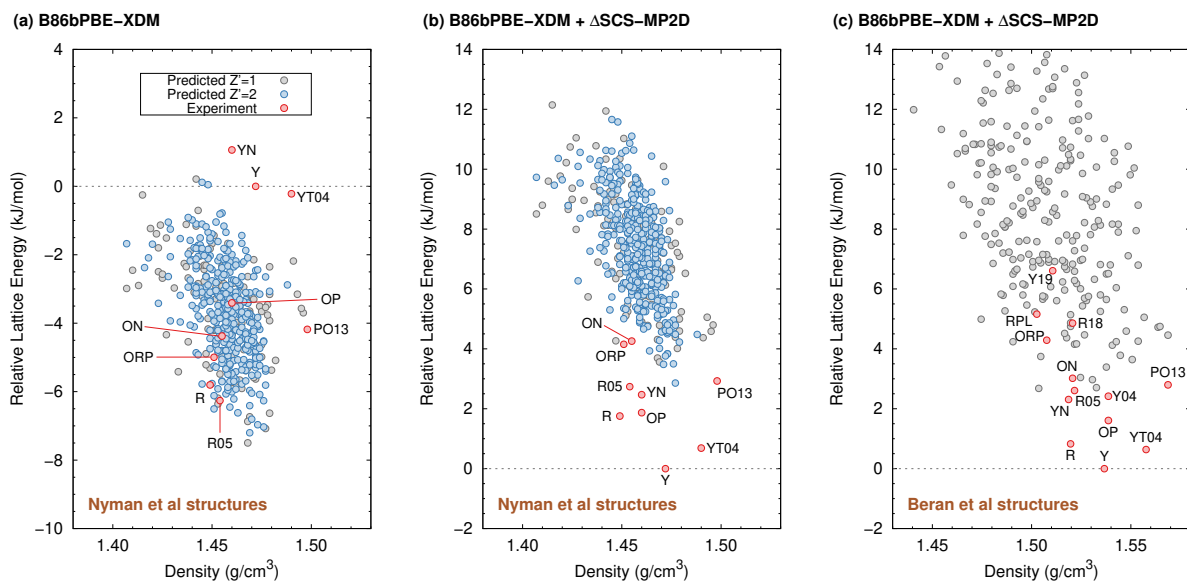

**Figure S4:** (a) The crystal energy landscape from Nyman et al,<sup>26</sup> after the single-point energy re-ranking with B86bPBE-XDM performed here. The landscape plotted here includes the 500 lowest-energy forms from their landscape plus the optimized experimental crystal structures they provided. (b) The Nyman et al landscape, after the SCS-MP2D monomer conformational energy correction is applied. (c) The final SCS-MP2D monomer-corrected landscape from Figure 2c of the main paper, which is repeated here for convenience.

## S2.5 High-pressure calculations

Figure S5 highlights which structures from the B86bPBE-XDM +  $\Delta$ SCS-MP2D monomer correction landscape were studied at higher pressures. The specific structures studied at high pressure are:

- **Experimental:** Y, YT04, R, OP, YN, Y04, R05, PO13, ON, ORP, R18, and Y19.
- **CSP candidates:** Ranks #9, #11, #13, #15, #17, #18, #21, #22, #25, #28, #29, #30, #35, and #41.

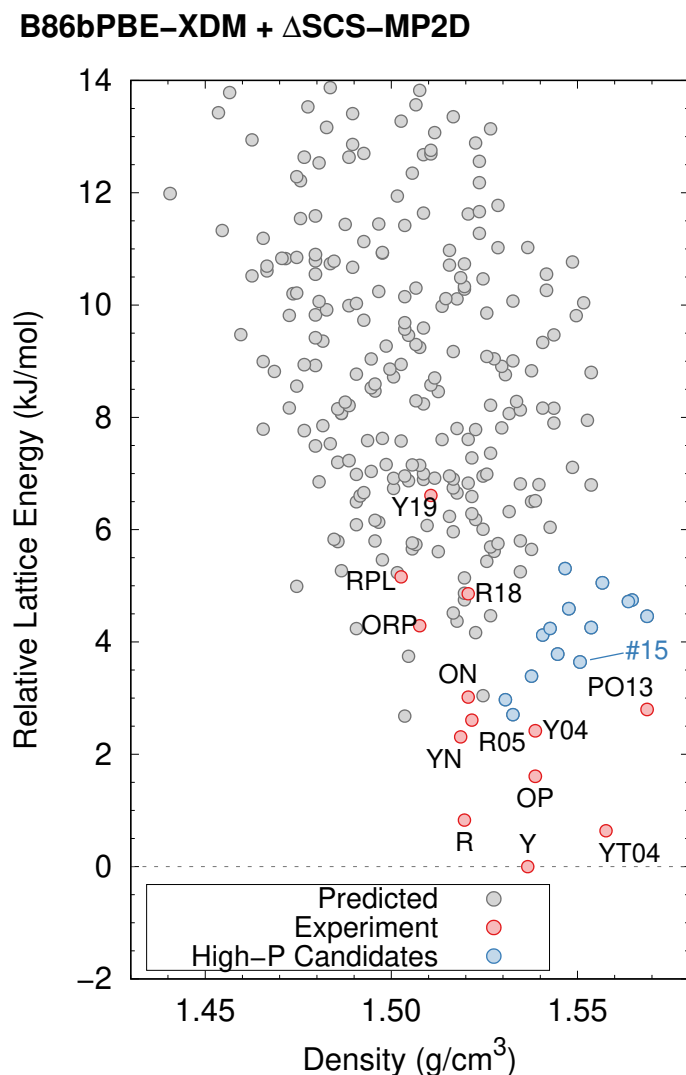

**Figure S5:** Pressure-dependent enthalpy calculations were performed for all experimental structures in red except RPL ( $Z=16$ ) and for the candidate structures shown in blue. The rank #15 structure which becomes more stable than all experimental polymorphs around 10 GPa is indicated.



## References

- (1) Pantelides, C. C.; Adjiman, C. S.; Kazantsev, A. V. General Computational Algorithms for Ab Initio Crystal Structure Prediction for Organic Molecules. *Top. Curr. Chem.* **2014**, *345*, 25–58.
- (2) Vasileiadis, M.; Kazantsev, A. V.; Karamertzanis, P. G.; Adjiman, C. S.; Pantelides, C. C. The polymorphs of ROY: application of a systematic crystal structure prediction technique. *Acta Cryst. B* **2012**, *68*, 677–685.
- (3) Sugden, I.; Adjiman, C. S.; Pantelides, C. C. Accurate and efficient representation of intramolecular energy in ab initio generation of crystal structures. I. Adaptive local approximate models. *Acta Cryst. B* **2016**, *72*, 864–874.
- (4) Sugden, I. J.; Adjiman, C. S.; Pantelides, C. C. Accurate and efficient representation of intramolecular energy in ab initio generation of crystal structures. II. Smoothed intramolecular potentials. *Acta Cryst. B* **2019**, *75*, 423–433.
- (5) Frisch, M. J.; Trucks, G. W.; Schlegel, H. B.; Scuseria, G. E.; Robb, M. A.; Cheeseman, J. R.; Scalmani, G.; Barone, V.; Mennucci, B.; Petersson, G. A.; Nakatsuji, H.; Caricato, M.; Li, X.; Hratchian, H. P.; Izmaylov, A. F.; Bloino, J.; Zheng, G.; Sonnenberg, J. L.; Hada, M.; Ehara, M.; Toyota, K.; Fukuda, R.; Hasegawa, J.; Ishida, M.; Nakajima, T.; Honda, Y.; Kitao, O.; Nakai, H.; Vreven, T.; Montgomery, J. A., Jr.; Peralta, J. E.; Ogliaro, F.; Bearpark, M.; Heyd, J. J.; Brothers, E.; Kudin, K. N.; Staroverov, V. N.; Kobayashi, R.; Normand, J.; Raghavachari, K.; Rendell, A.; Burant, J. C.; Iyengar, S. S.; Tomasi, J.; Cossi, M.; Rega, N.; Millam, J. M.; Klene, M.; Knox, J. E.; Cross, J. B.; Bakken, V.; Adamo, C.; Jaramillo, J.; Gomperts, R.; Stratmann, R. E.; Yazyev, O.; Austin, A. J.; Cammi, R.; Pomelli, C.; Ochterski, J. W.; Martin, R. L.; Morokuma, K.; Zakrzewski, V. G.; Voth, G. A.; Salvador, P.; Dannenberg, J. J.; Dapprich, S.; Daniels, A. D.; Farkas, Ö.; Foresman, J. B.; Ortiz, J. V.; Cioslowski, J.; Fox, D. J. Gaussian 09 Revision E.01. 2009; Gaussian Inc. Wallingford CT.
- (6) Habgood, M.; Sugden, I. J.; Kazantsev, A. V.; Adjiman, C. S.; Pantelides, C. C. Efficient Handling of Molecular Flexibility in Ab Initio Generation of Crystal Structures. *J. Chem. Theory Comput.* **2015**, 150306122603009.
- (7) Cox, S. R.; Hsu, L.-Y.; Williams, D. E. Nonbonded potential function models for crystalline oxohydrocarbons. *Acta Cryst. A* **1981**, *37*, 293–301.
- (8) Williams, D. E.; Cox, S. R. Nonbonded potentials for azahydrocarbons: the importance of the Coulombic interaction. *Acta Cryst. B* **1984**, *40*, 404–417.
- (9) Coombes, D. S.; Price, S. L.; Willock, D. J.; Leslie, M. Role of electrostatic interactions in determining the crystal structures of polar organic molecules. A distributed multipole study. *J. Phys. Chem.* **1996**, *100*, 7352–7360.

- (10) Beyer, T.; Price, S. L. Dimer or Catemer? Low-Energy Crystal Packings for Small Carboxylic Acids. *J. Phys. Chem. B* **2000**, *104*, 2647–2655.
- (11) Groom, C. R.; Bruno, I. J.; Lightfoot, M. P.; Ward, S. C. The Cambridge Structural Database. *Acta Cryst. B* **2016**, *72*, 171–179.
- (12) Chisholm, J. A.; Motherwell, W. D. S. COMPACK: A program for identifying crystal structure similarity using distances. *J. Appl. Crystall.* **2005**, *38*, 228–231.
- (13) Kazantsev, A. V.; Karamertzanis, P. G.; Adjiman, C. S.; Pantelides, C. C. Efficient Handling of Molecular Flexibility in Lattice Energy Minimization of Organic Crystals. *J. Chem. Theory Comput.* **2011**, *7*, 1998–2016.
- (14) Giannozzi, P.; Baroni, S.; Bonini, N.; Calandra, M.; Car, R.; Cavazzoni, C.; Ceresoli, D.; Chiarotti, G. L.; Cococcioni, M.; Dabo, I.; Dal Corso, A.; de Gironcoli, S.; Fabris, S.; Fratesi, G.; Gebauer, R.; Gerstmann, U.; Gougoussis, C.; Kokalj, A.; Lazzeri, M.; Martin-Samos, L.; Marzari, N.; Mauri, F.; Mazzarello, R.; Paolini, S.; Pasquarello, A.; Paulatto, L.; Sbraccia, C.; Scandolo, S.; Sclauzero, G.; Seitsonen, A. P.; Smogunov, A.; Umari, P.; Wentzcovitch, R. M. QUANTUM ESPRESSO: a modular and open-source software project for quantum simulations of materials. *J. Phys. Condens. Mat.* **2009**, *21*, 395502.
- (15) Giannozzi, P.; Andreussi, O.; Brumme, T.; Bunau, O.; Buongiorno Nardelli, M.; Calandra, M.; Car, R.; Cavazzoni, C.; Ceresoli, D.; Colonna, N.; Carnimeo, I.; Dal Corso, A.; de Gironcoli, S.; Delugas, P.; DiStasio, R. A.; Ferretti, A.; Floris, A.; Fratesi, G.; Fugallo, G.; Gebauer, R.; Gerstmann, U.; Giustino, F.; Gorni, T.; Jia, J.; Kawamura, M.; Ko, H.-Y.; Kokalj, A.; Küçükbenli, E.; Lazzeri, M.; Marsili, M.; Marzari, N.; Mauri, F.; Nguyen, N. L.; Nguyen, H.-V.; Otero-de-la Roza, A.; Paulatto, L.; Poncé, S.; Rocca, D.; Sabatini, R.; Santra, B.; Schlipf, M.; Seitsonen, A. P.; Smogunov, A.; Timrov, I.; Thonhauser, T.; Umari, P.; Vast, N.; Wu, X.; Baroni, S. Advanced capabilities for materials modelling with Quantum ESPRESSO. *J. Phys. Condens. Mat.* **2017**, *29*, 465901.
- (16) Becke, A. D. On the large-gradient behavior of the density functional exchange energy. *J. Chem. Phys.* **1986**, *38*, 7184–7187.
- (17) Perdew, J. P.; Burke, K.; Ernzerhof, M. Generalized gradient approximation made simple. *Phys. Rev. Lett.* **1996**, *77*, 3865.
- (18) Otero-de-la Roza, A.; Johnson, E. R. Van der Waals interactions in solids using the exchange-hole dipole moment model. *J. Chem. Phys.* **2012**, *136*, 174109.
- (19) Bowskill, D. H.; Sugden, I. J.; Pantelides, C. C.; Adjiman, C. S. . *in preparation* **2021**,
- (20) Parrish, R. M.; Burns, L. A.; Smith, D. G. A.; Simmonett, A. C.; DePrince, A. E.; Hohenstein, E. G.; Bozkaya, U.; Sokolov, A. Y.; Di Remigio, R.; Richard, R. M.; Gonthier, J. F.; James, A. M.; McAlexander, H. R.; Kumar, A.; Saitow, M.; Wang, X.; Pritchard, B. P.; Verma, P.; Schaefer, H. F.; Patkowski, K.; King, R. A.; Valeev, E. F.;

- Evangelista, F. A.; Turney, J. M.; Crawford, T. D.; Sherrill, C. D. Psi4 1.1: An Open-Source Electronic Structure Program Emphasizing Automation, Advanced Libraries, and Interoperability. *J. Chem. Theory Comput.* **2017**, *13*, 3185–3197.
- (21) The MP2D software can be downloaded at <https://github.com/Chandemonium/MP2D>.
- (22) Greenwell, C.; Řezáč, J.; Beran, G. J. O. Spin-component-scaled and dispersion-corrected second-order Møller-Plesset perturbation theory: An alternative path toward chemical accuracy. *ChemRxiv* **2021**,
- (23) Helgaker, T.; Klopper, W.; Koch, H.; Noga, J. Basis-set convergence of correlated calculations on water. *J. Chem. Phys.* **1997**, *106*, 9639–9646.
- (24) Greenwell, C.; McKinley, J. L.; Zhang, P.; Zeng, Q.; Sun, G.; Li, B.; Wen, S.; Beran, G. J. O. Overcoming the difficulties of predicting conformational polymorph energetics in molecular crystals via correlated wavefunction methods. *Chem. Sci.* **2020**, *11*, 2200–2214.
- (25) Thomas, S. P.; Spackman, M. A. The Polymorphs of ROY: A Computational Study of Lattice Energies and Conformational Energy Differences. *Austral. J. Chem.* **2018**, *71*, 279.
- (26) Nyman, J.; Yu, L.; Reutzel-Edens, S. M. Accuracy and reproducibility in crystal structure prediction: the curious case of ROY. *CrystEngComm* **2019**, *21*, 2080–2088.
- (27) Greenwell, C.; Beran, G. J. O. Inaccurate conformational energies still hinder crystal structure prediction in flexible organic molecules. *Cryst. Growth Des.* **2020**, *20*, 4875–4881.
